# Supplementary material for: Variation in rehabilitation setting after uncomplicated total knee or hip arthroplasty: a call for evidence-based guidelines
Source: BMC Musculoskelet Disord. 2019 May 15;20:214. doi: 10.1186/s12891-019-2570-8 (PMC6521339; doi:10.1186/s12891-019-2570-8)
Supplement: Supplementary file 2 — Additional detail about rehabilitation setting. Figure S1. Variation in rehabilitation setting by hospital: TKA. Figure S2. Variation in rehabilitation setting by hospital: THA. Table S1. Reasons for referral to inpatient rehabilitation as provided by the hospital. Table S2. Type of facility-based outpatient rehabilitation sessionsa by insurance status. (PDF 6967 kb) [file 12891_2019_2570_MOESM2_ESM.pdf]

## Additional File 2

### Variation in rehabilitation setting after uncomplicated total knee or hip arthroplasty: a call for evidence-based guidelines

Naylor JM, Hart A, Harris IA, Lewin A

**Figure S1. Variation in rehabilitation setting by hospital: TKA**

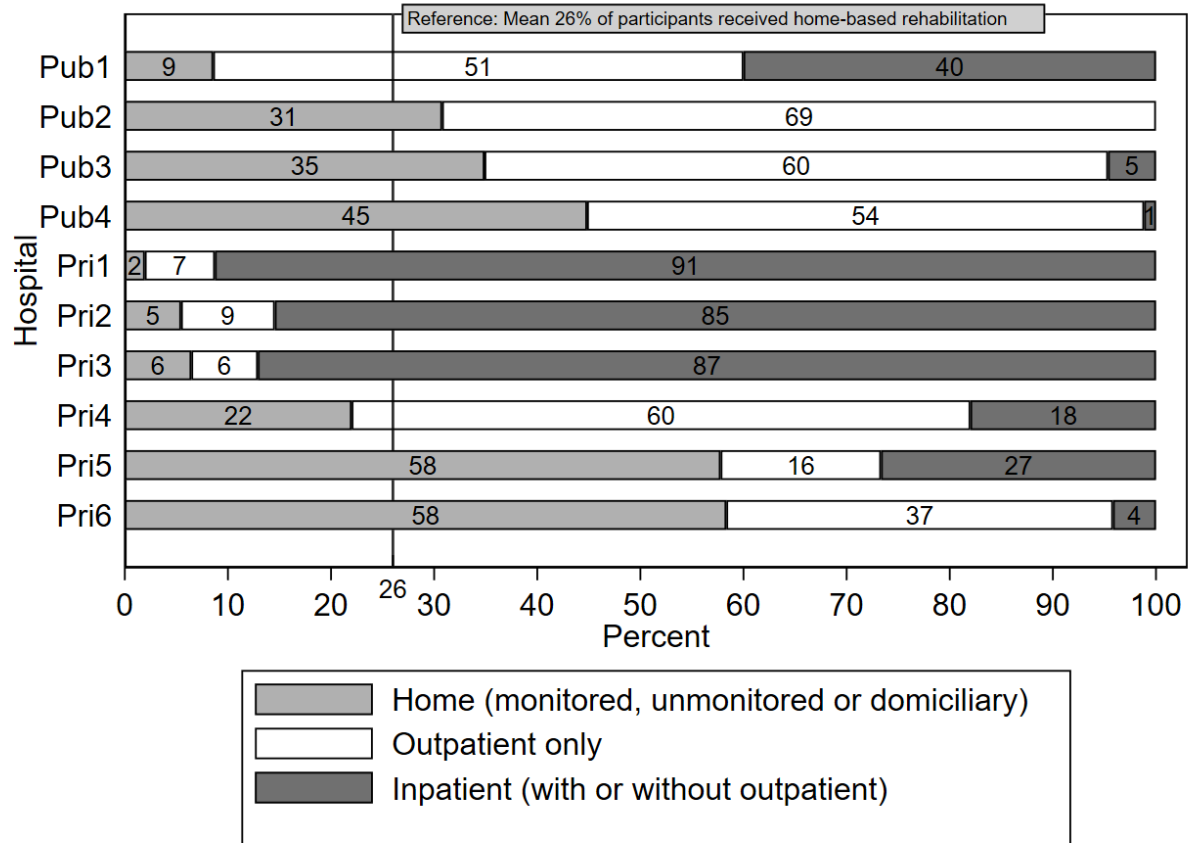

Legend: Only hospitals providing 20 or more patients included in the proportions; Pub = public; Pri = private.

**Figure 2. Variation in rehabilitation setting by hospital: THA**

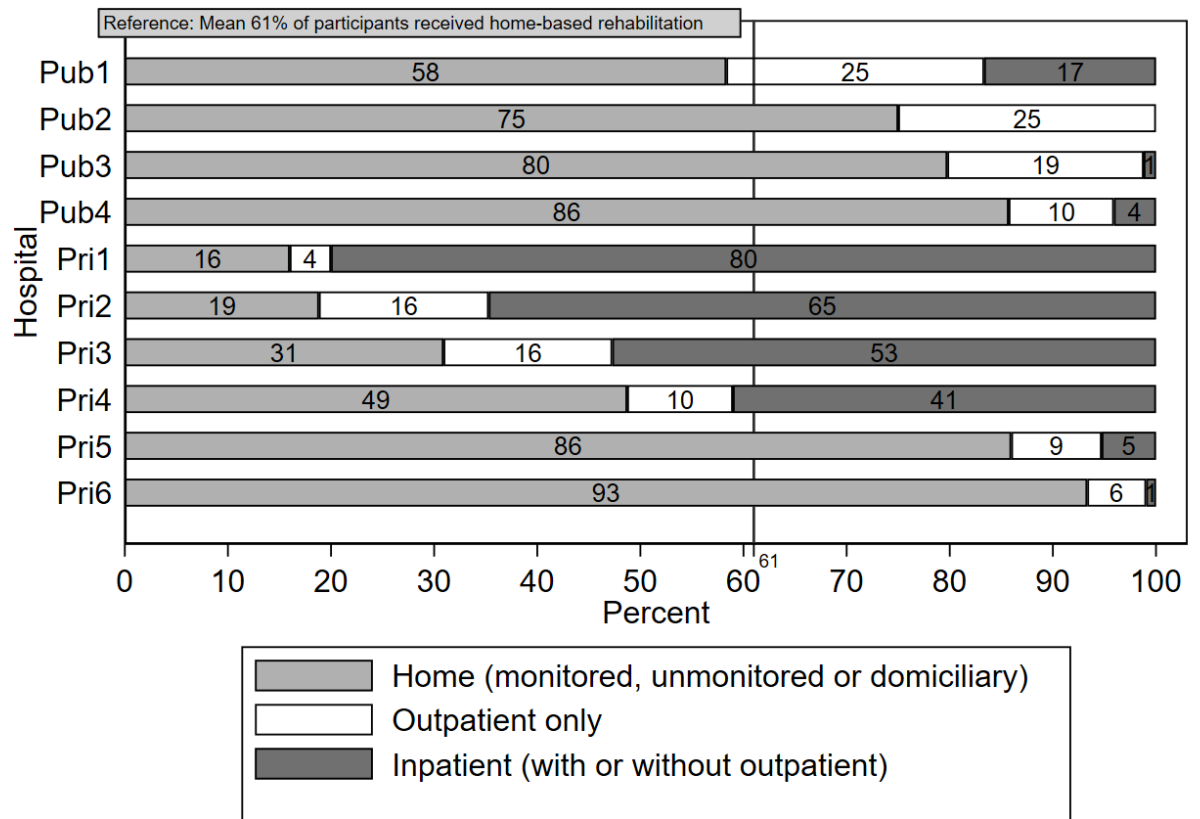

Legend: Only hospitals providing 20 or more patients included in the proportions; Pub = public; Pri = private

**Table S1. Reasons for referral to inpatient rehabilitation as provided by the hospital**

| Reason                      | Knee, N (%)    |                  |         | Hip, N (%)     |                  |         |
|-----------------------------|----------------|------------------|---------|----------------|------------------|---------|
|                             | Public<br>N=18 | Private<br>N=207 | P-value | Public<br>N=11 | Private<br>N=147 | P-value |
| Surgeon choice              | 1 (5.6)        | 119 (57.5)       | < 0.001 | 1 (9.1)        | 71 (48.3)        | < 0.001 |
| Patient choice              | 1 (5.6)        | 58 (28)          |         | 0              | 34 (23.1)        |         |
| Post-operative complication | 1 (5.6)        | 0                |         | 2 (18.2)       | 0                |         |
| Poor progress               | 8 (44.4)       | 4 (1.9)          |         | 7 (63.6)       | 7 (4.8)          |         |
| Other                       | 0              | 0                |         | 0              | 1 (0.7)          |         |
| Lack of social support      | 7 (38.9)       | 11 (5.3)         |         | 0              | 20 (13.6)        |         |
| Missing                     | 0              | 15 (7.2)         |         | 1 (9.1)        | 14 (9.5)         |         |

Three publicly insured patients were recorded by the hospital as being referred to inpatient rehabilitation due to a complication. These complications (pressure area on buttock; faecal incontinence; severe vomiting and anaemia) did not meet the criteria for a complication as per our definition.

**Table S2. Type of facility-based outpatient rehabilitation sessions<sup>a</sup> by insurance status**

| Type                        | Knee, N (%)     |                  |         | Hip, N (%)     |                  |         |
|-----------------------------|-----------------|------------------|---------|----------------|------------------|---------|
|                             | Public<br>N=160 | Private<br>N=265 | P-value | Public<br>N=69 | Private<br>N=157 | P-value |
| One-to-one                  | 92 (57.5)       | 140 (52.8)       | 0.35    | 43 (62.3)      | 72 (45.9)        | 0.023   |
| Gym                         | 66 (41.3)       | 36 (13.6)        | <.001   | 22 (31.9)      | 17 (10.8)        | <0.001  |
| Water (group or one-to-one) | 20 (12.5)       | 31 (11.7)        | 0.81    | 13 (18.8)      | 33 (21)          | 0.71    |
| Hospital Day program        | 9 (5.6)         | 110 (41.5)       | <.001   | 2 (2.9)        | 78 (49.7)        | <.001   |

<sup>a</sup>Restricted to people who were in the facility-based rehabilitation group; excludes gym or water-based sessions delivered as part of an inpatient program.
